# Supplementary material for: An aspartyl protease defines a novel pathway for export of Toxoplasma proteins into the host cell
Source: eLife journal article supplement (doi:10.7554/elife.10809), 2015-11-18
Supplement: supp [file elife-10809-supp-v1.zip]

Archive with 8 entries (8 files):
- elife_poa_e10809_Supplementary_File_1.docx
- elife_poa_e10809_Figure_8_figure_supplement_1.pdf
- elife_poa_e10809_Figure_2_figure_supplement_1.pdf
- elife_poa_e10809_Figure_2_figure_supplement_4.pdf
- elife_poa_e10809_Figure_4_figure_supplement_1.pdf
- elife_poa_e10809_Figure_2_figure_supplement_2.pdf
- elife_poa_e10809_Figure_2_figure_supplement_3.pdf
- elife_poa_e10809_Figure_10_figure_supplement_1.pdf
