# Supplementary material for: An aspartyl protease defines a novel pathway for export of Toxoplasma proteins into the host cell
Source: eLife journal article supplement (doi:10.7554/elife.10809), 2015-11-18
Supplement: supp [file elife-10809-supp-v1.zip › elife_poa_e10809_Figure_2_figure_supplement_1.pdf]

## Figure 2 - figure supplement 1

[illegible]

$\Delta asp5_{CRISPR}$

LKVADLCPEQDPQ.

ASP5MUT-HA<sub>3</sub>

ASP5-Mut    GTPPQRASVIL**ATG**SSL

ASP5-Mut    SGVDDFGNTMV**AsG**ITY

**14.4% Identity (153/1065), 32.6% Similarity (347/1065)**
