# Supplementary figures and images for: An aspartyl protease defines a novel pathway for export of Toxoplasma proteins into the host cell
Source: eLife journal article supplement (doi:10.7554/elife.10809), 2015-11-18

Figure 8 - figure supplement 1

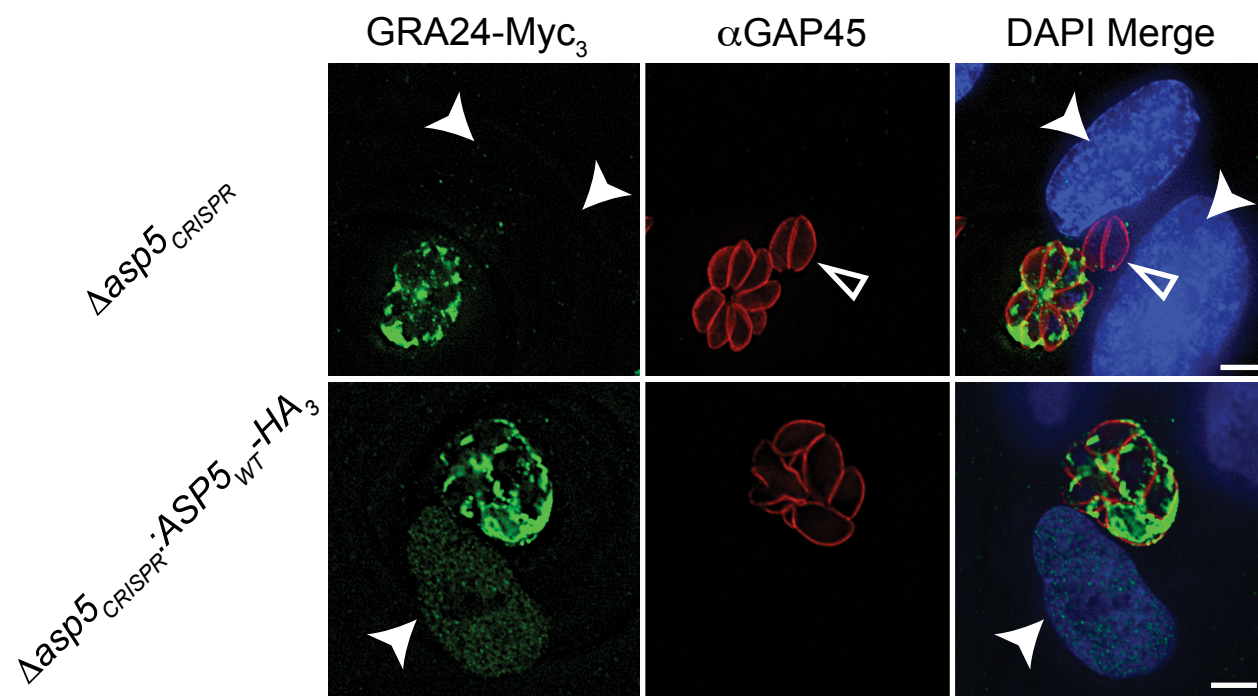

Supplement: supp [file elife-10809-supp-v1.zip › elife_poa_e10809_Figure_8_figure_supplement_1.pdf]

Figure 2 - figure supplement 4

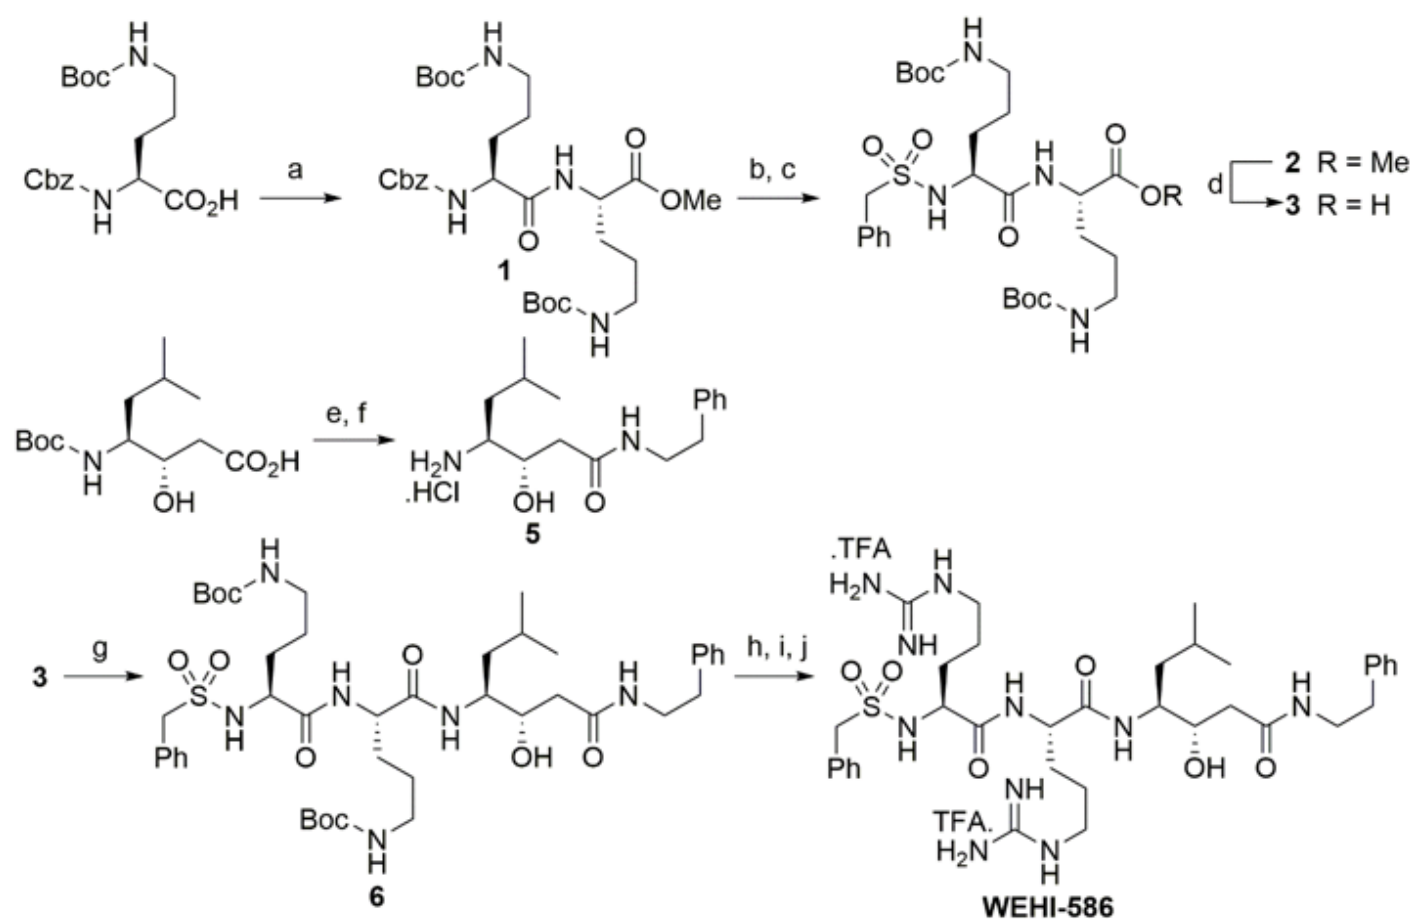

Supplement: supp [file elife-10809-supp-v1.zip › elife_poa_e10809_Figure_2_figure_supplement_4.pdf]

Figure 4 - Figure Supplement 1

Ai

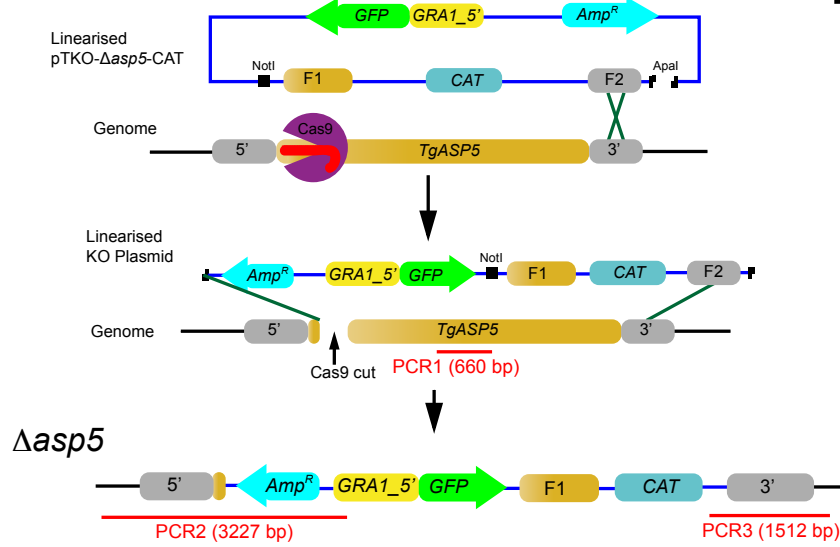

ii

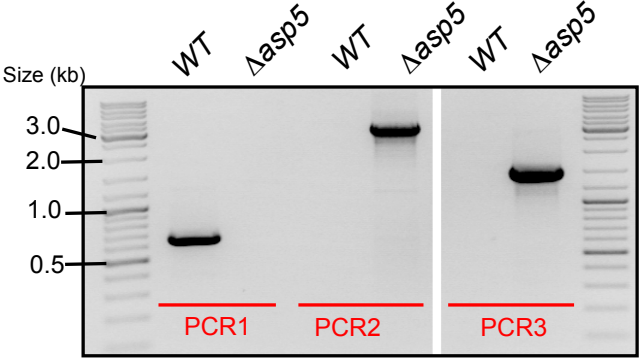

B

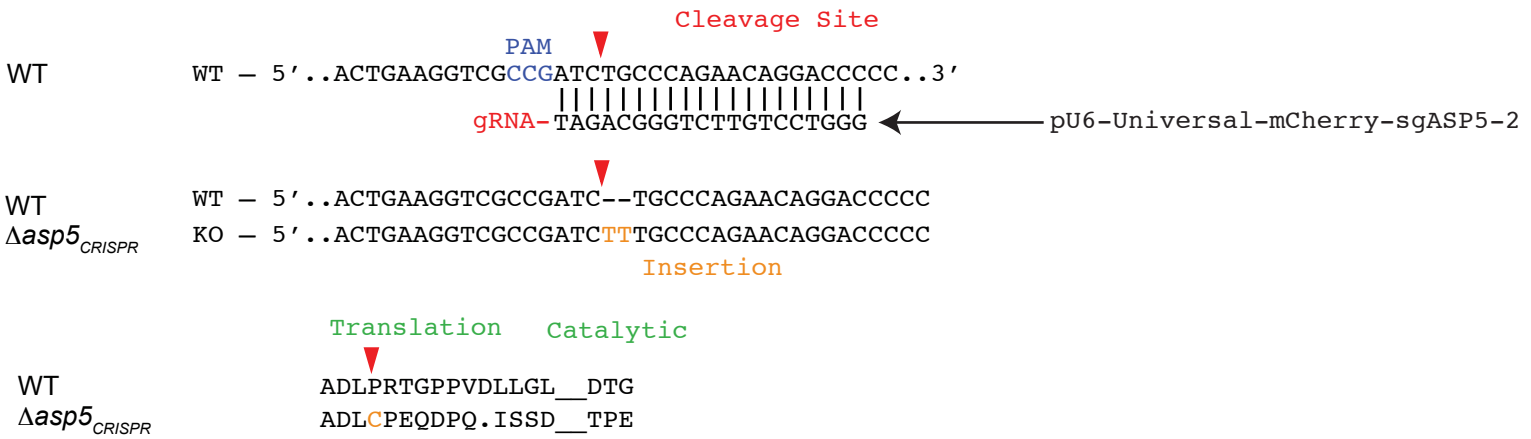

C

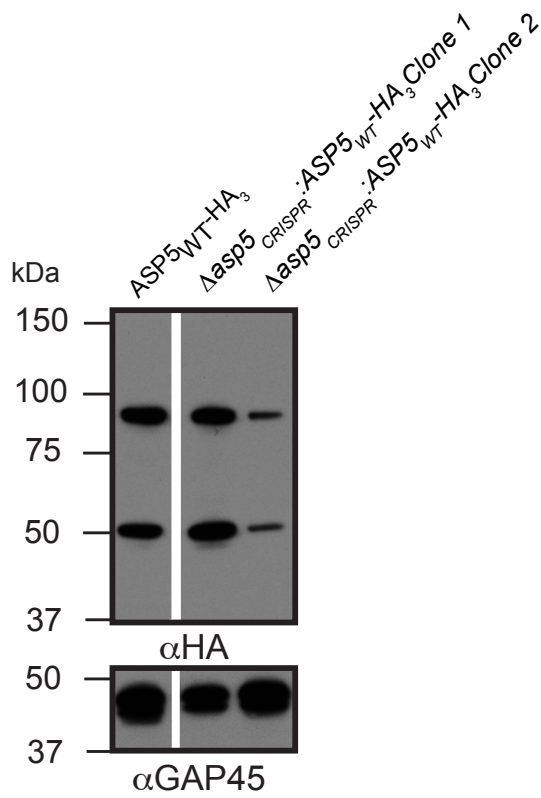

Supplement: supp [file elife-10809-supp-v1.zip › elife_poa_e10809_Figure_4_figure_supplement_1.pdf]

Figure 2 - figure supplement 2

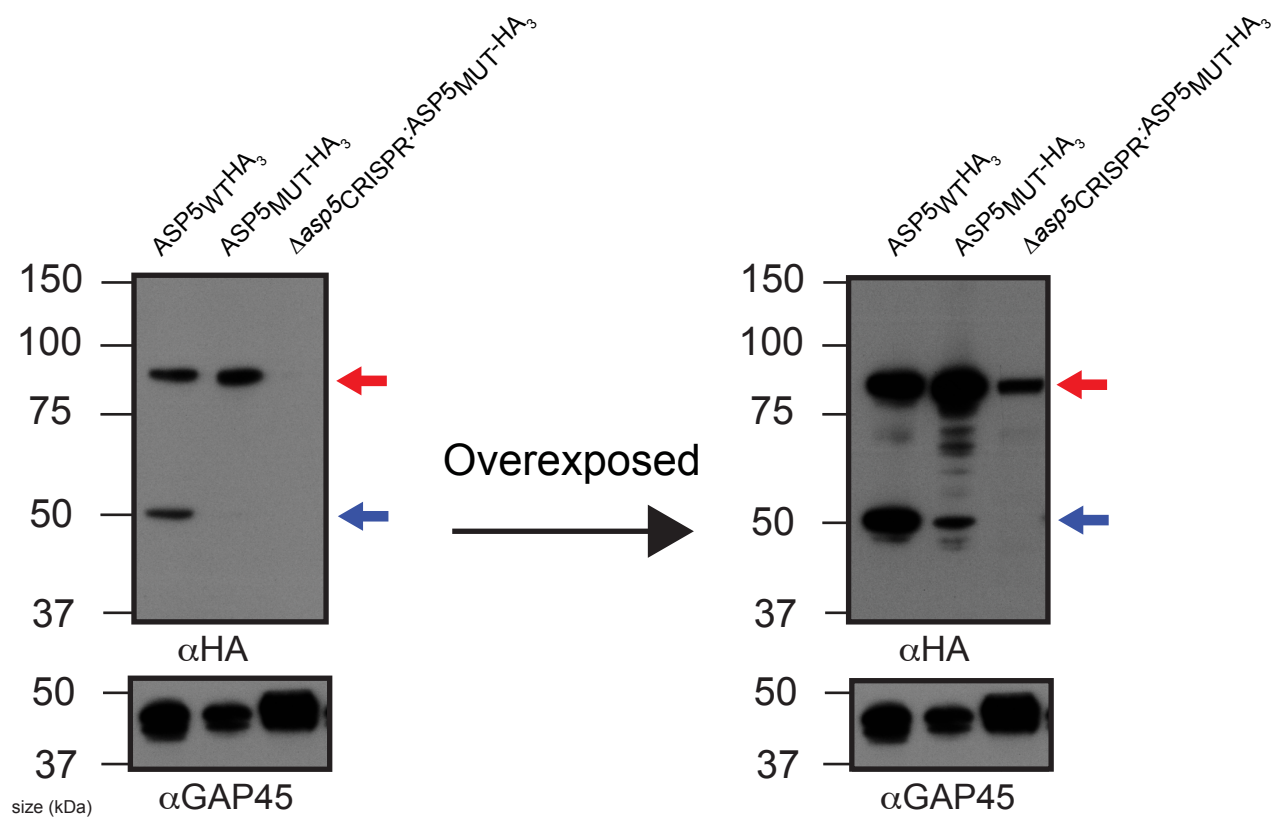

Supplement: supp [file elife-10809-supp-v1.zip › elife_poa_e10809_Figure_2_figure_supplement_2.pdf]

Figure 2 - figure supplement 3

A

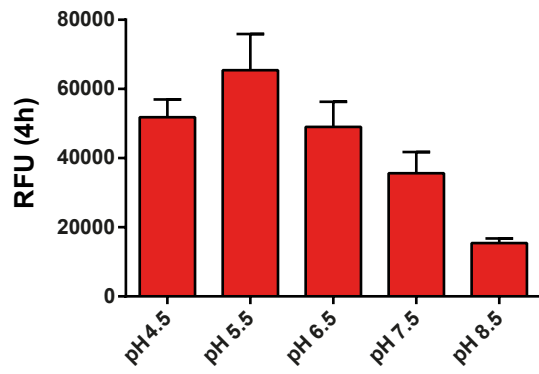

B

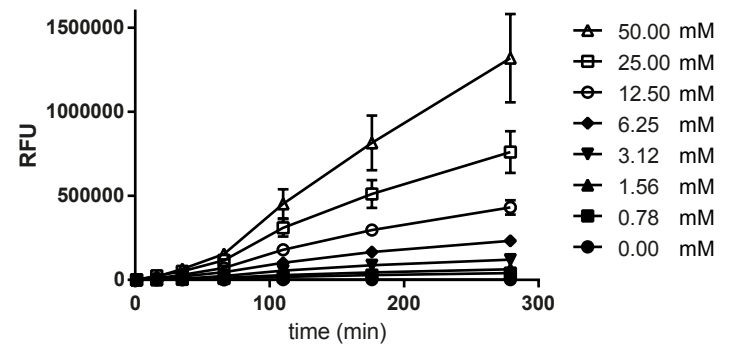

C

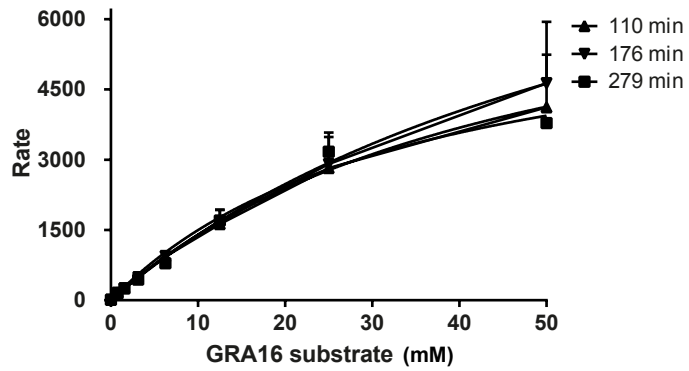

D

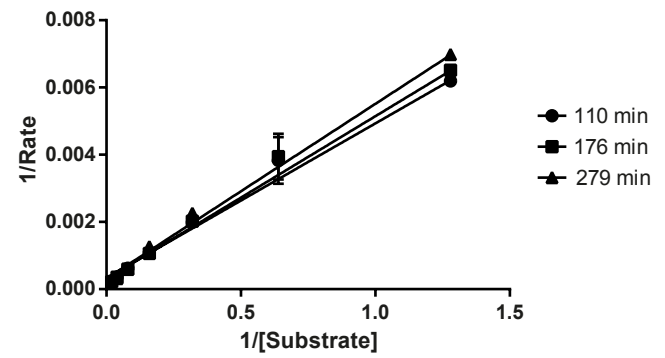

Supplement: supp [file elife-10809-supp-v1.zip › elife_poa_e10809_Figure_2_figure_supplement_3.pdf]

Figure 10 - Figure Supplement 1

A

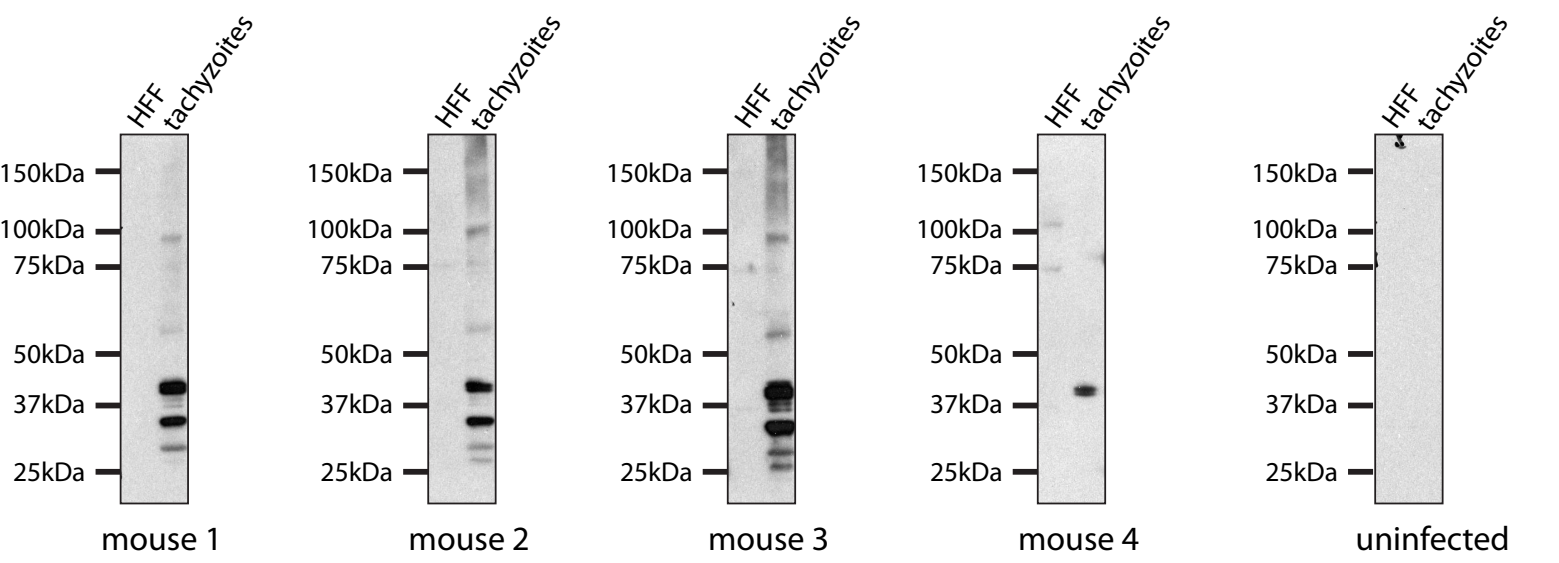

Supplement: supp [file elife-10809-supp-v1.zip › elife_poa_e10809_Figure_10_figure_supplement_1.pdf]
